# Supplementary material
Source: HighWire-hosted journal article supplement (https://bjgp.org/highwire/filestream/27584/field_highwire_adjunct_files/2/bjpg55-589AppendixS3.pdf)
Supplement: bjpg55-589AppendixS3.pdf [file bjpg55-589AppendixS3.pdf]

**Supplementary Appendix 3. Comorbidities included in the practice review database.**

| Major Comorbidity | Any Comorbidity                                                                                                                                                                                                                                                                                                                                                                                                                                                                                                                                                                                                                     |
|-------------------|-------------------------------------------------------------------------------------------------------------------------------------------------------------------------------------------------------------------------------------------------------------------------------------------------------------------------------------------------------------------------------------------------------------------------------------------------------------------------------------------------------------------------------------------------------------------------------------------------------------------------------------|
| Angina            | Angina                                                                                                                                                                                                                                                                                                                                                                                                                                                                                                                                                                                                                              |
| Diabetes          | Type 1 Insulin<br>Type 2 Diet<br>Type 2 Insulin<br>Type 2 Insulin & Oral Hypoglycaemic Agents<br>Type 2 Oral Hypoglycaemic Agents                                                                                                                                                                                                                                                                                                                                                                                                                                                                                                   |
| Dyslipidaema      | Dyslipidaema                                                                                                                                                                                                                                                                                                                                                                                                                                                                                                                                                                                                                        |
| Hypertension      | Hypertension                                                                                                                                                                                                                                                                                                                                                                                                                                                                                                                                                                                                                        |
| Vascular          | Congestive cardiac failure (CCF)<br>Coronary heart disease (CHD)<br>Myocardial infarct (MI)<br>Stroke/transient ischaemic attack (TIA)<br>Arthritis<br>Asthma<br>Binge eating disorder<br>Back pain<br>Breast cancer<br>Cancer of the cervix<br>Chest pain<br>Colon cancer<br>Depression/anxiety<br>Endometrial cancer<br>Fertility treatment<br>Gall stones<br>Gestational diabetes mellitus<br>Hirsutism<br>Hyperthyroidism<br>Hypothyroidism<br>Impaired glucose tolerance (IGT)<br>Menstrual irregularity<br>Polycystic ovary syndrome<br>Prostate cancer<br>Obstructive sleep apnoea<br>Stress incontinence<br>Suicide attempt |
